# Supplementary material for: Activating Mutations in the Gene Encoding the ATP-Sensitive Potassium-Channel Subunit Kir6.2 and Permanent Neonatal Diabetes
Source: Atypon-hosted journal article supplement (doi:10.1056/nejmoa032922), 2004-04-28
Supplement: nejm_gloyn_1838sa1.pdf [file nejm_gloyn_1838sa1.pdf]

# Supplementary Appendix

This appendix has been provided by the authors to give readers additional information about their work.

Supplement to: Gloyn AL, Pearson ER, Antcliff JF, et al. Activating Mutations in the Gene Encoding the ATP-Sensitive Potassium-Channel Subunit Kir6.2 and Permanent Neonatal Diabetes. *N Engl J Med* 2004;350:1838-49.

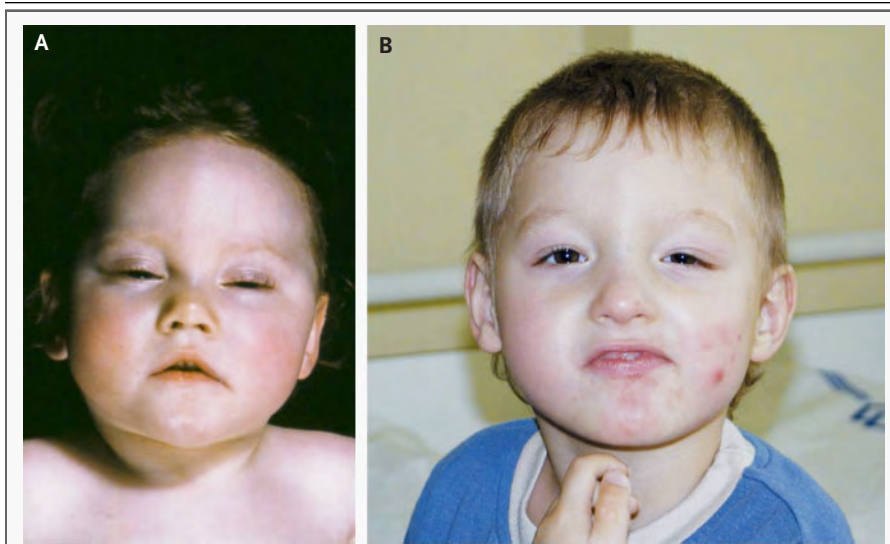

**Supplementary Appendix 1. Photographs of Patients with Neonatal Diabetes and Neurologic Abnormalities.**

The photographs illustrate the dysmorphic features of a prominent metopic suture, downturned corners of the mouth, and ptosis. Panel A shows the proband from family ISPAD 43, and Panel B the proband from family ISPAD 27.
